# Supplementary material for: Caffeine in the Diet: Country-Level Consumption and Guidelines
Source: Nutrients. 2018 Nov 15;10(11):1772. doi: 10.3390/nu10111772 (PMC6266969; doi:10.3390/nu10111772)

## **Caffeine in the diet: Country-level consumption and guidelines**

Celine Marie Reyes and Marilyn C Cornelis

### **Supplementary Information**

**Table S1.** Country Specific Guidelines Pertaining to Dietary Caffeine

| Country                         | Date                         | Intended audience                                                                                                                                        |
|---------------------------------|------------------------------|----------------------------------------------------------------------------------------------------------------------------------------------------------|
| Benin <sup>LI</sup>             | 2015                         | Healthy population 2+ years, primarily in urban and semi-urban settings. Specific guidelines for children, pregnant/nursing women, and other age groups. |
| Nigeria <sup>LMI</sup>          | 2001                         | Healthy population. Specific guidelines for children, pregnant/nursing women, and other age groups.                                                      |
| Seychelles <sup>HI</sup>        | 2006                         | Healthy population 2+ years. Specific guidelines for children and pregnant/nursing women.                                                                |
| Sierra Leona <sup>LI</sup>      | 2016                         | Healthy population. Specific guidelines for children, pregnant/nursing women, and other age groups.                                                      |
| South Africa <sup>UMI</sup>     | 2012                         | General population 5+ years. Specific guidelines proposed for children 0–5 years and pregnant/nursing women.                                             |
| Afghanistan <sup>LI</sup>       | 2015                         | General population. Specific guidelines for children, pregnant/nursing women, and other age groups.                                                      |
| Australia <sup>HI</sup>         | 2013                         | Healthy population 2+ years. Specific guidelines for children, pregnant/nursing women, and other age groups.                                             |
| Bangladesh <sup>LMI</sup>       | 2013                         | General population. Specific guidelines for children <2 years and pregnant/nursing women.                                                                |
| China <sup>UMI</sup>            | 2016                         | Healthy population 2+ years. Specific guidelines for children, pregnant/nursing women, and other age groups.                                             |
| Fiji <sup>UMI</sup>             | 2013                         | Healthy population. Specific guidelines for children and pregnant/nursing women.                                                                         |
| India <sup>LMI</sup>            | 2011                         | General population. Specific guidelines for children, pregnant/nursing women, and other age groups.                                                      |
| Indonesia <sup>LMI</sup>        | 2014                         | General population. Specific guidelines for children, pregnant/nursing women, and other age groups.                                                      |
| Japan <sup>HI</sup>             | 2010                         | Healthy population. Specific guidelines for children.                                                                                                    |
| Malaysia <sup>UMI</sup>         | 2010                         | General population 2+ years.                                                                                                                             |
| Nepal <sup>LI</sup>             | 2012                         | General population. Specific guidelines for children and pregnant/nursing women.                                                                         |
| New Zealand <sup>HI</sup>       | 2008<br>2012<br>2008<br>2013 | Infants and toddlers (0-2 years)<br>Children and young people (2-18 years)<br>Pregnant/nursing women<br>Older people                                     |
| Republic of Korea <sup>HI</sup> | 2010                         | Specific guidelines for children, pregnant/nursing women, and other age groups.                                                                          |
| Sri Lanka <sup>LMI</sup>        | 2011                         | General population. Specific guidelines for children, pregnant/nursing women, and other age groups.                                                      |
| Thailand <sup>UMI</sup>         | 2008-10                      | General population 6+ years. Specific guidelines for children, pregnant/nursing women, and other age groups.                                             |
| Vietnam <sup>LMI</sup>          | 2013                         | General population. Specific guidelines for children and pregnant/nursing women.                                                                         |
| Iran <sup>UMI</sup>             | 2015                         | General population 2+ years.                                                                                                                             |
| Lebanon <sup>UMI</sup>          | 2013                         | Adult population. Specific guidelines for children and pregnant/nursing women.                                                                           |
| Qatar <sup>HI</sup>             | 2015                         | Healthy population 2+ years. Specific guidelines for children and pregnant/nursing women.                                                                |
| Albania <sup>UMI</sup>          | 2008                         | General population. Specific guidelines for children, pregnant/nursing women, and other age groups.                                                      |

|                              |                      |                                                                                                              |
|------------------------------|----------------------|--------------------------------------------------------------------------------------------------------------|
| Austria <sup>HI</sup>        | 2010                 | General population. Specific guidelines for children, pregnant/nursing women, and other age groups.          |
| Belgium <sup>HI</sup>        | 2005                 | General population. Specific guidelines for children, pregnant/nursing women, and other age groups.          |
| Bulgaria <sup>UMI</sup>      | 2006                 | Adult population. Specific guidelines for children and pregnant/nursing women.                               |
| Croatia <sup>HI</sup>        | 2002                 | Specific guidelines for pregnant/nursing women and other age groups.                                         |
| Cyprus <sup>HI</sup>         | 2007                 | General population. Specific guidelines for age groups.                                                      |
| Denmark <sup>HI</sup>        | 2013                 | Healthy population 3+ years. Specific guidelines for children and pregnant/nursing women.                    |
| Estonia <sup>HI</sup>        | 2006                 | General adult population. Specific guidelines for children, pregnant/nursing women, and other age groups.    |
| Finland <sup>HI</sup>        | 2014                 | Healthy population. Specific guidelines for children, pregnant/nursing women, and other age groups.          |
| France <sup>HI</sup>         | 2011                 | General population. Specific guidelines for children, pregnant/nursing women, and other age groups.          |
| Georgia <sup>UMI</sup>       | 2005                 | General population. Specific guidelines for children, pregnant/nursing women, and other age groups.          |
| Germany <sup>HI</sup>        | 2013                 | Healthy population.                                                                                          |
| Greece <sup>HI</sup>         | 1999                 | Adult population.                                                                                            |
| Hungary <sup>HI</sup>        | 2004<br>2016         | Healthy adult population. Specific guidelines for pregnant/nursing women.                                    |
| Ireland <sup>HI</sup>        | 2012                 | General population 5+ years. Specific guidelines for children and pregnant/nursing women.                    |
| Israel <sup>HI</sup>         | 2008                 | General population.                                                                                          |
| Italy <sup>HI</sup>          | 2003                 | Healthy population. Specific guidelines for children, pregnant/nursing women, and other age groups.          |
| Latvia <sup>HI</sup>         | 2008<br>2003<br>2007 | Adults (and pregnant/nursing women)<br>Children<br>Elderly                                                   |
| Malta <sup>HI</sup>          | 2016                 | General adult population. Specific guidelines for children and pregnant/nursing women.                       |
| Netherlands <sup>HI</sup>    | 2016                 | General population. Specific guidelines for children and pregnant/nursing women.                             |
| Norway <sup>HI</sup>         | 2014                 | General population. Specific guidelines for children, pregnant/nursing women, and other age groups.          |
| Poland <sup>HI</sup>         | 2010                 | General adult population. Specific guidelines for children, pregnant/nursing women, and other age groups.    |
| Portugal <sup>HI</sup>       | 2003                 | Healthy population. Specific guidelines for children and pregnant/nursing women.                             |
| Romania <sup>UMI</sup>       | 2006                 | Healthy population. Specific guidelines for children and pregnant/nursing women.                             |
| Slovenia <sup>HI</sup>       | 2011                 | Healthy population 2+ years.                                                                                 |
| Spain <sup>HI</sup>          | 2008                 | General population. Specific guidelines for children, pregnant/nursing women, and other age groups.          |
| Sweden <sup>HI</sup>         | 2015                 | Healthy population 2+ years. Specific guidelines for children, pregnant/nursing women, and other age groups. |
| Switzerland <sup>HI</sup>    | 2011                 | Healthy adult population. Specific guidelines for age groups.                                                |
| Turkey <sup>UMI</sup>        | 2006                 | General population. Specific guidelines for children and pregnant/nursing women.                             |
| United Kingdom <sup>HI</sup> | 2016                 | General population 2+ years. Specific guidelines for children and pregnant/nursing women.                    |

|                                                 |      |                                                                                                              |
|-------------------------------------------------|------|--------------------------------------------------------------------------------------------------------------|
| Antigua and Barbuda <sup>HI</sup>               | 2013 | General population 2+ years.                                                                                 |
| Argentina <sup>UMI</sup>                        | 2015 | General population 2+ years. Specific guidelines for children and pregnant/nursing women.                    |
| Bahamas <sup>HI</sup>                           | 2002 | Healthy population 2+ years. Specific guidelines for children and pregnant/nursing women.                    |
| Barbados <sup>HI</sup>                          | 2017 | General population 2+ years.                                                                                 |
| Belize <sup>HI</sup>                            | 2012 | Healthy population 2+ years.                                                                                 |
| Bolivia (Plurinational State of) <sup>LMI</sup> | 2013 | Healthy population 2+ years. Specific guidelines for children, pregnant/nursing women, and other age groups. |
| Brazil <sup>UMI</sup>                           | 2014 | General population 2+ years. Specific guidelines for children <2 years and pregnant/nursing women.           |
| Chile <sup>HI</sup>                             | 2013 | General population 2+ years. Specific guidelines for children, pregnant/nursing women, and other age groups. |
| Colombia <sup>UMI</sup>                         | 2014 | Healthy population 2+ years. Specific guidelines for children, pregnant/nursing women, and other age groups. |
| Costa Rica <sup>UMI</sup>                       | 2010 | Healthy population 2+ years.                                                                                 |
| Cuba <sup>UMI</sup>                             | 2009 | General population 2+ years. Specific guidelines for children <2 years and pregnant/nursing women.           |
| Dominica <sup>UMI</sup>                         | 2007 | Healthy population 2+ years.                                                                                 |
| Dominican Republic <sup>UMI</sup>               | 2009 | Healthy population 2+ years. Specific guidelines for children <2 years and pregnant/nursing women.           |
| El Salvador <sup>LMI</sup>                      | 2012 | Healthy population 2+ years. Specific guidelines for children and pregnant/nursing women.                    |
| Grenada <sup>UMI</sup>                          | 2016 | Healthy population 2+ years.                                                                                 |
| Guatemala <sup>LMI</sup>                        | 2012 | General population 2+ years. Specific guidelines for children <2 years and pregnant/nursing women.           |
| Honduras <sup>LMI</sup>                         | 2013 | Healthy population 2+ years. Specific guidelines for children and pregnant/nursing women.                    |
| Jamaica <sup>UMI</sup>                          | 2015 | General population 2+ years.                                                                                 |
| Mexico <sup>UMI</sup>                           | 2015 | General population. Specific guidelines for children, pregnant/nursing women, and other age groups.          |
| Panama <sup>UMI</sup>                           | 2013 | Healthy population 2+ years. Specific guidelines for children and pregnant/nursing women.                    |
| Paraguay <sup>UMI</sup>                         | 2015 | General population 2+ years. Specific guidelines for children <2 years and pregnant/nursing women.           |
| Saint Kitts and Nevis <sup>HI</sup>             | 2010 | Healthy population 2+ years.                                                                                 |
| Saint Lucia <sup>UMI</sup>                      | 2007 | Healthy population 2+ years.                                                                                 |
| Saint Vincent and the Grenadines <sup>UMI</sup> | 2006 | Healthy population 2+ years.                                                                                 |
| Uruguay <sup>HI</sup>                           | 2016 | General population 2+ years. Specific guidelines for children and pregnant/nursing women.                    |
| Venezuela <sup>UMI</sup>                        | 1991 | General population 2+ years. Specific guidelines for children and pregnant/nursing women.                    |
| Canada <sup>HI</sup>                            | 2007 | General population 2+ years. Specific guidelines for children and pregnant/nursing women.                    |
| United States <sup>HI</sup>                     | 2016 | General population 2+ years. Specific guidelines for children and pregnant/nursing women.                    |

HI: high-income; LI: low-income; LMI: lower-middle-income; UMI: upper-middle-income

**Figure S1.** Data Collection Strategy for Dietary Caffeine Guidelines

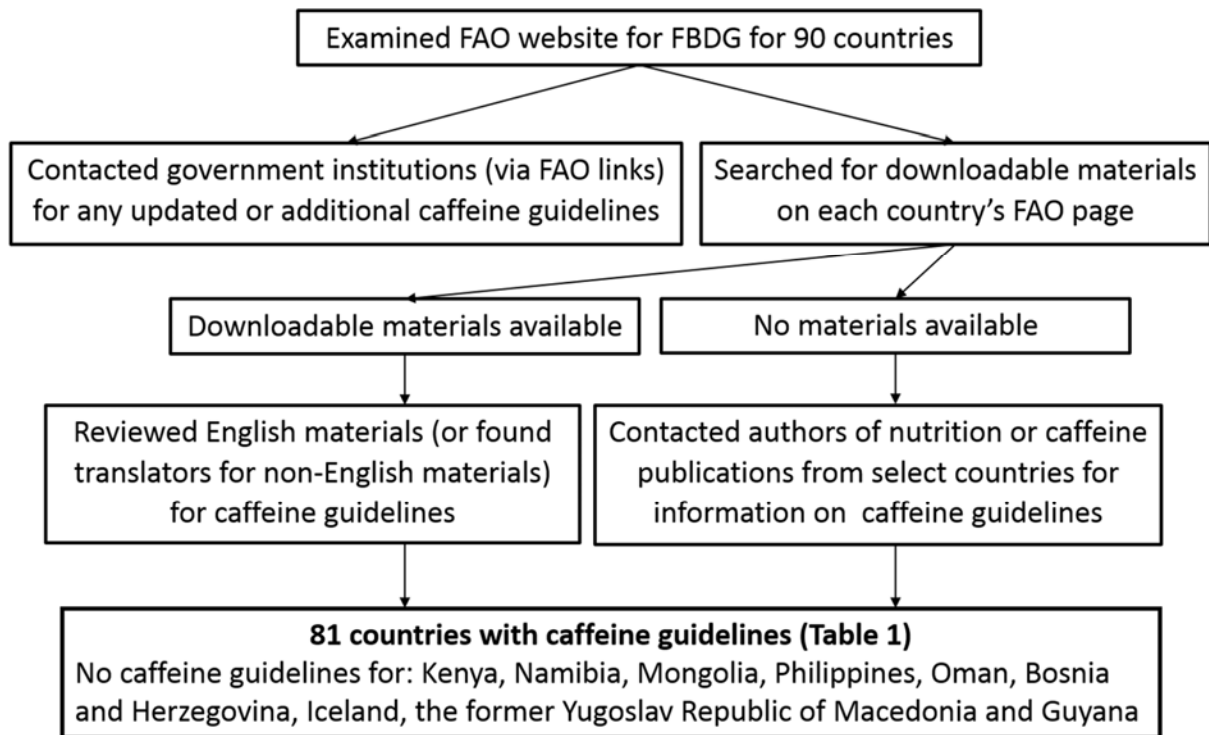

Supplement: Supplementary file 1 [file nutrients-10-01772-s001.pdf]
